# Supplementary material for: Novel acrylamide/acrylonitrile-tethered carbazoles: synthesis, structural, biological, and density functional theory studies
Source: Royal Society of Chemistry journal article supplement (doi:10.1039/c9nj02170a), 2019-01-01
Supplement: c9nj02170a1.pdf [file c9nj02170a1.pdf]

**Novel acrylamide / acrylonitrile tethered carbazoles: synthesis, structural, biological and density functional theory studies**

Krishnaraj Padmavathy<sup>a</sup>, Kannan Gokula Krishnan<sup>a</sup>, Chandran Udhaya Kumar<sup>a</sup>, Ethiraj Sathiyaraj<sup>a</sup>, Ramar Sivaramakarathikeyan<sup>a</sup>, Wei-Meng Lim<sup>b</sup>, Chun-Wai Mai<sup>b,c</sup>, Chennan Ramalingan<sup>a\*</sup>

<sup>a</sup> *Department of Chemistry, School of Advanced Sciences, Kalasalingam Academy of Research and Education (Deemed to be University), Krishnankoil, 626 126, Tamilnadu, India.*

<sup>b</sup> *School of Pharmacy, International Medical University, 126 Jalan Jalil Perkasa 19, 57000, Bukit Jalil, Kuala Lumpur, Malaysia.*

<sup>c</sup> *Center for Cancer and Stem Cell Research, Institute for Research, Development and Innovation (IRDI), International Medical University, 126, Jalan Jalil Perkasa 19, 57000, Bukit Jalil, Kuala Lumpur, Malaysia.*

*\*Corresponding author: ramalinganc@gmail.com*

**Supplementary Information**

**Table S1.** Experimental and calculated structural parameters of **6g**.

| <b>Bond length</b> | <b>Expt</b> | <b>Calc</b> | <b>Bond length</b> | <b>Expt</b> | <b>Calc</b> |
|--------------------|-------------|-------------|--------------------|-------------|-------------|
| C1-C2              | 1.428(6)    | 1.413       | C15-C20            | 1.413(5)    | 1.425       |
| C1-N4              | 1.141(5)    | 1.158       | C16-C17            | 1.363(5)    | 1.383       |
| C3-C2              | 1.343(5)    | 1.356       | C18-C17            | 1.411(5)    | 1.420       |
| S5-C2              | 1.761(4)    | 1.822       | C18-C19            | 1.393(5)    | 1.408       |
| C18-C3             | 1.438(5)    | 1.447       | C19-C20            | 1.379(5)    | 1.386       |
| S5-O6              | 1.429(3)    | 1.467       | C21-C20            | 1.442(5)    | 1.449       |
| S5-O7              | 1.433(3)    | 1.462       | C21-C22            | 1.390(5)    | 1.396       |
| S5-C8              | 1.752(4)    | 1.801       | C21-C26            | 1.395(5)    | 1.416       |
| C8-C9              | 1.377(6)    | 1.393       | C23-C22            | 1.382(6)    | 1.390       |
| C13-C8             | 1.371(5)    | 1.394       | C23-C24            | 1.380(6)    | 1.402       |
| C10-C9             | 1.386(6)    | 1.393       | C25-C24            | 1.366(5)    | 1.392       |
| C11-C10            | 1.381(7)    | 1.394       | C25-C26            | 1.395(5)    | 1.395       |
| C12-C11            | 1.361(7)    | 1.395       | C27-C28            | 1.512(6)    | 1.535       |
| C13-C12            | 1.375(6)    | 1.391       | C29-C28            | 1.492(6)    | 1.532       |
| N14-C15            | 1.373(5)    | 1.377       | C29-C30            | 1.448(7)    | 1.533       |
| N14-C26            | 1.398(5)    | 1.397       | C30-C31            | 1.528(12)   | 1.533       |
| N14-C27            | 1.448(5)    | 1.457       | C31-C32            | 1.209(14)   | 1.531       |
| C16-C15            | 1.384(5)    | 1.400       |                    |             |             |
| <b>Bond angle</b>  | <b>Expt</b> | <b>Calc</b> | <b>Bond angle</b>  | <b>Expt</b> | <b>Calc</b> |
| C3-C2-C1           | 126.5(4)    | 127.8       | C17-C16-C15        | 119.1(4)    | 117.8       |
| C1-C2-S5           | 113.0(3)    | 114.6       | C16-C17-C18        | 121.7(4)    | 122.5       |
| C3-C2-S5           | 120.5(3)    | 117.6       | C17-C18-C3         | 123.3(4)    | 116.7       |
| C2-C3-C18          | 132.0(4)    | 131.3       | C19-C18-C3         | 118.3(3)    | 124.5       |
| O6-S5-C2           | 107.3(19)   | 106.4       | C19-C18-C17        | 118.4(4)    | 118.9       |
| O7-S5-C2           | 108.5(18)   | 107.6       | C20-C19-C18        | 121.1(4)    | 119.6       |
| C8-S5-C2           | 102.5(17)   | 103.9       | C19-C20-C15        | 118.7(4)    | 120.2       |
| O6-S5-O7           | 120.3(18)   | 121.6       | C15-C20-C21        | 106.5(3)    | 106.5       |
| O6-S5-C8           | 108.2(19)   | 108.0       | C19-C20-C21        | 134.8(4)    | 133.4       |
| O7-S5-C8           | 108.4(2)    | 107.9       | C22-C21-C20        | 134.0(4)    | 133.8       |
| C9-C8-S5           | 118.5(3)    | 119.0       | C26-C21-C20        | 107.0(3)    | 106.5       |

|                       |             |             |                       |             |             |
|-----------------------|-------------|-------------|-----------------------|-------------|-------------|
| C13-C8-S5             | 120.2(4)    | 119.2       | C22-C21-C26           | 119.0(4)    | 119.7       |
| C13-C8-C9             | 121.2(4)    | 121.9       | C23-C22-C21           | 118.8(4)    | 118.9       |
| C8-C9-C10             | 118.7(5)    | 118.7       | C24-C23-C22           | 120.9(4)    | 120.7       |
| C11-C10-C9            | 119.8(5)    | 120.2       | C25-C24-C23           | 121.8(4)    | 121.5       |
| C12-C11-C10           | 120.7(5)    | 120.4       | C24-C25-C26           | 117.3(4)    | 117.6       |
| C11-C12-C13           | 119.9(5)    | 120.1       | C21-C26-N14           | 109.0(3)    | 109.1       |
| C8-C13-C12            | 119.7(5)    | 118.8       | C25-C26-N14           | 128.9(4)    | 129.4       |
| C15-N14-C26           | 108.5(3)    | 108.7       | C21-C26-C25           | 122.1(4)    | 121.6       |
| C15-N14-C27           | 126.8(3)    | 125.7       | N14-C27-C28           | 113.4(3)    | 113.7       |
| C26-N14-C27           | 124.8(3)    | 125.5       | C29-C28-C27           | 114.4(4)    | 112.4       |
| N14-C15-C16           | 129.8(4)    | 129.7       | C30-C29-C28           | 116.8(5)    | 113.3       |
| N14-C15-C20           | 109.1(3)    | 109.2       | C29-C30-C31           | 112.8(6)    | 113.5       |
| C16-C15-C20           | 121.0(4)    | 121.1       | C32-C31-C30           | 118.4(11)   | 113.2       |
| <b>Dihedral angle</b> | <b>Expt</b> | <b>Calc</b> | <b>Dihedral angle</b> | <b>Expt</b> | <b>Calc</b> |
| C18-C3-C2-C1          | 2.33        | -0.5        | C26-N14-C27-C28       | 84.25       | 89.3        |
| C18-C3-C2-S5          | -176.2      | 177.5       | C17-C16-C15-N14       | -179.98     | -179.5      |
| O6-S5-C2-C1           | 170.53      | 179.4       | C17-C16-C15-C20       | -0.26       | 0.3         |
| O7-S5-C2-C1           | 38.99       | 47.6        | N14-C15-C20-C19       | 179.69      | 179.5       |
| C8-S5-C2-C1           | -75.54      | -66.7       | N14-C15-C20-C21       | 0.66        | -0.4        |
| O6-S5-C2-C3           | -10.76      | 1.1         | C16-C15-C20-C19       | -0.08       | -0.4        |
| O7-S5-C2-C3           | -142.3      | -130.6      | C16-C15-C20-C21       | -179.12     | 179.7       |
| C8-S5-C2-C3           | 103.18      | 115.1       | C15-C16-C17-C18       | 0.33        | -0.1        |
| C17-C18-C3-C2         | 0.83        | -178.8      | C3-C18-C17-C16        | 178.97      | -179.8      |
| C19-C18-C3-C2         | 179.85      | 1.3         | C19-C18-C17-C16       | -0.06       | 0.0         |
| C2-S5-C8-C9           | 82          | 90.2        | C3-C18-C19-C20        | -179.37     | 179.7       |
| C2-S5-C8-C13          | -93.62      | -90.3       | C17-C18-C19-C20       | -0.29       | -0.1        |
| O6-S5-C8-C9           | -164.78     | -157.1      | C18-C19-C20-C15       | 0.36        | 0.3         |
| O6-S5-C8-C13          | 19.6        | 22.4        | C18-C19-C20-C21       | 179.06      | -179.8      |
| O7-S5-C8-C9           | -32.65      | -23.9       | C22-C21-C20-C15       | 179.12      | 179.8       |
| O7-S5-C8-C13          | 151.72      | 155.6       | C26-C21-C20-C15       | -0.45       | 0.0         |
| S5-C8-C9-C10          | -176.11     | 179.9       | C22-C21-C20-C19       | 0.31        | -0.1        |
| C13-C8-C9-C10         | -0.53       | -178.8      | C26-C21-C20-C19       | -179.26     | -179.9      |
| C12-C13-C8-S5         | 176.36      | -179.7      | C20-C21-C22-C23       | -178.63     | -180.0      |

|                 |         |        |                 |         |        |
|-----------------|---------|--------|-----------------|---------|--------|
| C12-C13-C8-C9   | 0.85    | -0.2   | C26-C21-C22-C23 | 0.9     | -0.1   |
| C11-C10-C9-C8   | 0.65    | -0.2   | C20-C21-C26-N14 | 0.09    | 0.5    |
| C12-C11-C10-C9  | -1.13   | -0.2   | C20-C21-C26-C25 | 179.58  | -179.8 |
| C13-C12-C11-C10 | 1.45    | 0.3    | C22-C21-C26-N14 | -179.56 | -179.4 |
| C8-C13-C12-C11  | -1.3    | -0.1   | C22-C21-C26-C25 | -0.06   | 0.3    |
| C26-N14-C15-C16 | 179.14  | -179.4 | C24-C23-C22-C21 | -1.53   | 0.0    |
| C26-N14-C15-C20 | -0.61   | 0.7    | C22-C23-C24-C25 | 1.32    | 0.0    |
| C27-N14-C15-C16 | 0.78    | -1.8   | C26-C25-C24-C23 | -0.45   | 0.1    |
| C27-N14-C15-C20 | -178.97 | 178.3  | C24-C25-C26-N14 | 179.21  | 179.3  |
| C15-N14-C26-C21 | 0.32    | -0.8   | C24-C25-C26-C21 | -0.18   | -0.3   |
| C15-N14-C26-C25 | -179.13 | 179.6  | N14-C27-C28-C29 | 64.44   | -179.9 |
| C27-N14-C26-C21 | 178.71  | -178.4 | C30-C29-C28-C27 | 179.63  | -179.1 |
| C27-N14-C26-C25 | -0.73   | 2.0    | C28-C29-C30-C31 | 174.4   | 180.0  |
| C15-N14-C27-C28 | -97.65  | -87.9  | C29-C30-C31-C32 | -172.05 | -179.6 |

**Table S2.** Experimental and calculated vibrational frequencies along with their proposed assignment of **6g**

| Mode | Expt | Unscaled | Scale | $I_{IR}$ | Assignment                                                                                              |
|------|------|----------|-------|----------|---------------------------------------------------------------------------------------------------------|
| 1    |      | 14       | 14    | 3.8      | $\Gamma C2C3C18C17$ [35]; $\Gamma C3C2S5C8$ [27]                                                        |
| 2    |      | 15       | 15    | 3.37     | $\Gamma C15N14C27C28$ [23]; $\Gamma C18C3C2S5$ [10]; $\Gamma C29C28C27N14$ [18]                         |
| 3    |      | 20       | 19    | 3.43     | $\Gamma C18C3C2S5$ [33]; $\tau C3C17C19C18$ [10]                                                        |
| 4    |      | 27       | 26    | 3.38     | $\Gamma C2S5C8C9$ [47]; $\Gamma C3C2S5C8$ [11]; $\tau C27C15C26N14$ [17]                                |
| 5    |      | 32       | 31    | 3.03     | $\Gamma C2S5C8C9$ [33]; $\Gamma C3C2S5C8$ [22]; $\tau C27C15C26N14$ [18]                                |
| 6    |      | 46       | 45    | 4.4      | $\Gamma C2C3C18C17$ [16]; $\Gamma C3C2S5C8$ [17]                                                        |
| 7    |      | 58       | 56    | 1.08     | $\Gamma C29C28C27N14$ [24]; $\Gamma C28C29C30C31$ [10]                                                  |
| 8    |      | 59       | 57    | 2.89     | $\Gamma C27C28C29C30$ [38]                                                                              |
| 9    |      | 67       | 65    | 2.03     | $\Gamma C15N14C27C28$ [13]; $\Gamma C28C29C30C31$ [23]                                                  |
| 10   |      | 74       | 72    | 3.95     | $\beta C2C3C18$ [14]; $\beta C3C18C19$ [14]; $\Gamma C29C30C31C32$ [10]                                 |
| 11   |      | 105      | 102   | 1        | $\tau C27C15C26N14$ [15]; $\beta C28C29C30$ [17]; $\beta C29C30C31$ [13]                                |
| 12   |      | 114      | 111   | 6.17     | $\tau C20C21C26C22$ [20]; $\tau C21C15C19C20$ [12]                                                      |
| 13   |      | 133      | 129   | 6.02     | $\Gamma C29C28C27N14$ [10]; $\Gamma C28C29C30C31$ [10]; $\Gamma C29C30C31C32$ [10]; $\beta C1C2C3$ [17] |
| 14   |      | 136      | 132   | 7.14     | $\Gamma C29C28C27N14$ [15]; $\Gamma C28C29C30C31$ [17]                                                  |
| 15   |      | 141      | 137   | 1.86     | $\Gamma C27C28C29C30$ [13]; $\Gamma C29C30C31C32$ [16]; $\beta C3C2S5$ [13]                             |
| 16   |      | 142      | 138   | 3.88     | $\beta C3C2S5$ [21]                                                                                     |
| 17   |      | 149      | 145   | 4.8      | $\beta C3C2S5$ [35]                                                                                     |
| 18   |      | 165      | 160   | 8.45     | $\beta C2C1N4$ [12]; $\beta C1C2C3$ [23]                                                                |
| 19   |      | 184      | 178   | 4.38     | $\beta C9C8S5$ [50]; $\beta C8S5O7$ [12]                                                                |
| 20   |      | 195      | 189   | 3.51     | $\tau C1C3S5C2$ [11]; $\beta C8S5O7$ [11]                                                               |
| 21   |      | 219      | 212   | 2.46     | $\beta C27C28C29$ [10]; $\beta C30C31C32$ [11]                                                          |
| 22   |      | 246      | 239   | 1.91     | $\Gamma H56C32C31C30$ [27]; $\Gamma H58C32C31C30$ [23]                                                  |
| 23   |      | 249      | 242   | 2.67     | $\Gamma H57C32C31C30$ [15]; $\beta C27C28C29$ [16]; $\beta C30C31C32$ [16]                              |

|    |     |     |     |       |                                                                                                              |
|----|-----|-----|-----|-------|--------------------------------------------------------------------------------------------------------------|
| 24 |     | 277 | 269 | 5.4   | $\tau$ S5C8C9C13 [23]; $\tau$ O6C2O7S5 [11]                                                                  |
| 25 |     | 281 | 273 | 3.7   | $\beta$ C26N14C27 [19]                                                                                       |
| 26 |     | 294 | 285 | 5.91  | $\beta$ C26N14C27 [12]; $\beta$ C8S5O7 [10]; $\Gamma$ C15C20C18C19 [13]                                      |
| 27 |     | 302 | 293 | 6.36  | $\nu$ S5C8 [38]; $\tau$ O6C2O7S5 [11]                                                                        |
| 28 |     | 314 | 305 | 4.5   | $\beta$ C2S5C8 [17]; $\Gamma$ N4C1C2S5 [11]                                                                  |
| 29 |     | 330 | 320 | 4.93  | $\Gamma$ C21C26C24C25 [10]                                                                                   |
| 30 |     | 349 | 339 | 2.74  | $\beta$ C3C18C19 [14]; $\beta$ C8S5O7 [15]                                                                   |
| 31 |     | 401 | 389 | 7.38  | $\Gamma$ C19C20C21C26 [15]                                                                                   |
| 32 |     | 413 | 401 | 3     | $\Gamma$ C10C9C11C12 [38]; $\Gamma$ C11C10C12C13 [20]; $\Gamma$ H34C9C10C11 [11]; $\Gamma$ H38C13C12C11 [12] |
| 33 |     | 415 | 403 | 19.39 | $\Gamma$ C15C20C18C19 [13]; $\Gamma$ C15C20C16C17 [18]; $\beta$ O6S5O7 [18]                                  |
| 34 |     | 423 | 410 | 6.11  | $\beta$ C9C8S5 [13]; $\tau$ O7C2C8S5 [30]                                                                    |
| 35 | 420 | 435 | 422 | 9.82  | $\tau$ C20C21C26C22 [10]; $\Gamma$ C15C20C18C19 [14]; $\Gamma$ C15C20C16C17 [10]                             |
| 36 |     | 438 | 425 | 9.74  | $\beta$ C27C28C29 [11]; $\beta$ C28C29C30 [12]; $\beta$ C29C30C31 [11]; $\beta$ C30C31C32 [33]               |
| 37 |     | 450 | 437 | 8.04  | $\Gamma$ C15C20C16C17 [12]                                                                                   |
| 38 |     | 458 | 444 | 10.19 | $\Gamma$ C15C20C16C17 [11]; $\beta$ O6S5O7 [14]                                                              |
| 39 |     | 465 | 451 | 8.31  | $\tau$ N14C21C25C26 [12]                                                                                     |
| 40 |     | 488 | 473 | 7.82  | $\beta$ C2C1N4 [16]                                                                                          |
| 41 |     | 529 | 513 | 33.16 | $\beta$ O6S5O7 [11]; $\tau$ O6C2O7S5 [18]                                                                    |
| 42 |     | 544 | 528 | 25.57 | $\beta$ O6S5O7 [10]; $\tau$ O6C2O7S5 [11]                                                                    |
| 43 |     | 580 | 563 | 11.6  | $\Gamma$ C24C23C25C26 [18]; $\Gamma$ C23C22C24C25 [34]                                                       |
| 44 |     | 588 | 570 | 63.39 | $\Gamma$ C17C16C18C19 [26]                                                                                   |
| 45 | 596 | 610 | 592 | 25.28 | $\beta$ C19C20C21 [12]; $\beta$ C16C15C20 [21]                                                               |
| 46 |     | 619 | 600 | 32.54 | $\tau$ C3C17C19C18 [10]                                                                                      |
| 47 |     | 628 | 609 | 1.84  | $\beta$ C9C10C11 [31]; $\beta$ C11C12C13 [43]                                                                |
| 48 |     | 632 | 613 | 30.11 | $\beta$ C20C21C26 [14]                                                                                       |
| 49 | 626 | 642 | 623 | 11.95 | $\beta$ C18C19C20 [19]; $\beta$ C23C24C25 [11]; $\beta$ C16C17C18 [22]                                       |
| 50 |     | 649 | 630 | 30.89 | $\Gamma$ N4C1C2S5 [16]; $\tau$ C1C3S5C2 [26]; $\tau$ C3C17C19C18 [13]                                        |
| 51 | 686 | 702 | 681 | 27.42 | $\Gamma$ C10C9C11C12 [18]; $\Gamma$ C11C10C12C13 [14]; $\Gamma$ C8C13C11C12 [39]; $\Gamma$ H36C11C12C13 [10] |

|    |     |     |     |       |                                                                                    |
|----|-----|-----|-----|-------|------------------------------------------------------------------------------------|
| 52 |     | 718 | 696 | 35.86 | vS5C8 [24]; $\beta$ C10C11C12 [29]                                                 |
| 53 |     | 736 | 714 | 10.8  | ГH54C31C30C29 [12]; ГH50C29C30C31 [16]; ГH52C30C31C32 [18]; $\beta$ H50C29C30 [11] |
| 54 |     | 745 | 723 | 11.57 | ГC8C13C11C12 [21]                                                                  |
| 55 |     | 746 | 724 | 15.37 | ГH43C23C24C25 [11]                                                                 |
| 56 |     | 749 | 727 | 11.37 | ГH48C28C29C30 [11]                                                                 |
| 57 |     | 753 | 730 | 22.93 | $\beta$ H34C9C10 [16]; $\beta$ H35C10C11 [13]                                      |
| 58 |     | 764 | 741 | 17.44 | ГH36C11C12C13 [14]; ГH35C10C11C12 [18]; ГH37C12C11C10 [19]                         |
| 59 | 746 | 767 | 744 | 18.77 | $\tau$ N14C21C25C26 [24]; ГC21C26C24C25 [11]; ГH44C24C25C26 [11]                   |
| 60 |     | 782 | 759 | 6.18  | ГC21C26C24C25 [10]; $\tau$ C21C15C19C20 [18]; ГH41C19C20C15 [10]                   |
| 61 |     | 794 | 770 | 24.05 | ГH49C28C29C30 [11]; $\beta$ H46C27H47 [11]                                         |
| 62 |     | 799 | 775 | 20.78 | $\beta$ C1C2C3 [13]; vC1C2 [10]                                                    |
| 63 | 798 | 818 | 793 | 24.69 | ГC15C20C16C17 [11]; ГH39C16C17C18 [42]; ГH40C17C18C3 [31]                          |
| 64 |     | 858 | 832 | 0.21  | ГH34C9C10C11 [24]; ГH35C10C11C12 [25]; ГH37C12C11C10 [23]; ГH38C13C12C11 [27]      |
| 65 |     | 863 | 837 | 0.71  | ГH43C23C24C25 [18]; ГH45C25C26N14 [42]; ГH42C22C23C24 [19]                         |
| 66 | 848 | 867 | 841 | 15.47 | vC16C17 [11]; $\beta$ H40C17C18 [11]                                               |
| 67 |     | 896 | 869 | 21.74 | vC30C31 [16]                                                                       |
| 68 |     | 899 | 872 | 19.01 | vC30C31 [13]                                                                       |
| 69 |     | 919 | 891 | 9.84  | ГH41C19C20C15 [68]; ГC15C20C18C19 [15]                                             |
| 70 |     | 920 | 892 | 4.07  | $\beta$ H52C30C31 [13]; ГH53C30C31C32 [10]                                         |
| 71 |     | 943 | 915 | 1.66  | ГH34C9C10C11 [26]; ГH36C11C12C13 [29]; ГH38C13C12C11 [28]                          |
| 72 |     | 945 | 917 | 5.6   | ГH45C25C26N14 [19]; ГH42C22C23C24 [31]; ГH44C24C25C26 [22]                         |
| 73 | 921 | 947 | 919 | 4.33  | ГH39C16C17C18 [22]; ГH33C3C2S5 [18]; ГH40C17C18C3 [31]                             |
| 74 |     | 977 | 948 | 9.88  | ГH33C3C2S5 [60]; ГH40C17C18C3 [20]                                                 |
| 75 |     | 984 | 954 | 0.69  | ГH42C22C23C24 [14]; ГH43C23C24C25 [36]; ГH44C24C25C26 [32]                         |
| 76 |     | 992 | 962 | 0.69  | ГH34C9C10C11 [21]; ГH38C13C12C11 [18]; ГH35C10C11C12 [21]; ГH37C12C11C10 [30]      |

|     |      |      |      |       |                                                                                                                |
|-----|------|------|------|-------|----------------------------------------------------------------------------------------------------------------|
| 77  |      | 1001 | 971  | 3.96  | vC27C28 [24]; vC29C30 [30]; vC31C32 [26]                                                                       |
| 78  |      | 1011 | 981  | 5.18  | $\beta$ H50C29C30 [16]; $\beta$ H52C30C31 [10]; $\beta$ H48C28C29 [13]; $\Gamma$ H53C30C31C32 [11]             |
| 79  |      | 1012 | 982  | 20.5  | $\beta$ C10C11C12 [12]; $\beta$ C9C10C11 [15]; $\beta$ C11C12C13 [13]; vC1C2 [10]                              |
| 80  |      | 1016 | 986  | 3.13  | $\Gamma$ H35C10C11C12 [22]; $\Gamma$ H36C11C12C13 [36]; $\Gamma$ H37C12C11C10 [13]; $\Gamma$ C11C10C12C13 [10] |
| 81  |      | 1018 | 987  | 18.25 | vC1C2 [16]                                                                                                     |
| 82  |      | 1032 | 1001 | 8.17  | vC9C10 [18]; vC12C13 [19]                                                                                      |
| 83  |      | 1034 | 1003 | 3.68  | vC27C28 [24]; vC28C29 [12]                                                                                     |
| 84  |      | 1043 | 1012 | 15.99 | $\beta$ C9C10C11 [13]; $\beta$ C11C12C13 [14]; vC10C11 [15]; vC11C12 [15]                                      |
| 85  |      | 1048 | 1017 | 11.98 | $\beta$ H42C22C23 [10]; $\beta$ H45C25C26 [11]; vC23C24 [24]                                                   |
| 86  |      | 1049 | 1018 | 3.64  | vC28C29 [39]; vC31C32 [22]                                                                                     |
| 87  |      | 1067 | 1035 | 3.09  | vC29C30 [35]; vC31C32 [13]; vC30C31 [28]                                                                       |
| 88  |      | 1075 | 1043 | 57.12 | vS5O7 [17]; vS5O6 [19]; vC8C9 [12]; vC8C13 [11]                                                                |
| 89  |      | 1084 | 1051 | 12.72 | $\beta$ C24C25C26 [25]; vN14C27 [18]                                                                           |
| 90  |      | 1102 | 1069 | 12.15 | $\beta$ H34C9C10 [14]; $\beta$ H36C11C12 [12]; $\beta$ H38C13C12 [12]                                          |
| 91  |      | 1122 | 1088 | 56.46 | vS5C8 [12]; vS5O7 [20]; vS5O6 [24]; vC8C9 [10]; vC8C13 [11]                                                    |
| 92  |      | 1136 | 1102 | 13.75 | $\Gamma$ H57C32C31C30 [13]; $\Gamma$ H58C32C31C30 [11]; vC30C31 [12]                                           |
| 93  |      | 1147 | 1113 | 16.52 | $\beta$ H43C23C24 [12]; vC24C25 [11]; vC22C23 [14]                                                             |
| 94  |      | 1165 | 1130 | 42.98 | $\beta$ H42C22C23 [10]                                                                                         |
| 95  |      | 1181 | 1146 | 21.35 | $\beta$ H39C16C17 [14]; $\beta$ H44C24C25 [20]; $\beta$ H45C25C26 [12]                                         |
| 96  |      | 1184 | 1148 | 7.59  | $\beta$ H44C24C25 [14]                                                                                         |
| 97  |      | 1186 | 1150 | 1.43  | vC11C12 [10]; $\beta$ H36C11C12 [37]; $\beta$ H35C10C11 [18]; $\beta$ H37C12C13 [20]                           |
| 98  | 1159 | 1201 | 1165 | 11.62 | $\beta$ H34C9C10 [17]; $\beta$ H38C13C12 [16]; $\beta$ H35C10C11 [19]; $\beta$ H37C12C13 [18]                  |
| 99  |      | 1214 | 1178 | 40.57 | vC3C18 [23]                                                                                                    |
| 100 | 1197 | 1225 | 1188 | 23.56 | $\beta$ H50C29C30 [10]                                                                                         |
| 101 |      | 1254 | 1216 | 40.22 | vC20C21 [12]; vC21C26 [11]                                                                                     |
| 102 |      | 1261 | 1223 | 7.8   | $\Gamma$ H50C29C30C31 [11]; $\Gamma$ H51C29C30C31 [16]                                                         |
| 103 |      | 1262 | 1224 | 47.07 | $\Gamma$ H49C28C29C30 [11]; $\Gamma$ H53C30C31C32 [11]                                                         |



|     |      |      |      |       |                                                                                 |
|-----|------|------|------|-------|---------------------------------------------------------------------------------|
| 104 |      | 1292 | 1253 | 15.95 | βH48C28C29 [12]; βH54C31C32 [13]                                                |
| 105 | 1232 | 1295 | 1256 | 43.79 | vS5O7 [44]; vS5O6 [36]                                                          |
| 106 |      | 1313 | 1274 | 28.95 | βH41C19C20 [32]; βH40C17C18 [13]                                                |
| 107 |      | 1325 | 1285 | 3.13  | βH54C31C32 [20]; βH46C27C28 [15]                                                |
| 108 |      | 1327 | 1287 | 3.26  | ГH48C28C29C30 [11]; ГH49C28C29C30 [14];<br>ГH55C31C30C29 [12]                   |
| 109 |      | 1331 | 1291 | 2.2   | vC8C9 [21]; βH35C10C11 [13]; βH37C12C13 [14];<br>vC8C13 [17]                    |
| 110 |      | 1333 | 1293 | 7.52  | βH50C29C30 [38]; ГH51C29C30C31 [11];<br>βH48C28C29 [10]                         |
| 111 |      | 1339 | 1299 | 10.49 | βH48C28C29 [19]; βH52C30C31 [21]; βH54C31C32<br>[18]                            |
| 112 |      | 1347 | 1307 | 4.63  | βH34C9C10 [24]; βH38C13C12 [24]; vC9C10 [14];<br>vC12C13 [14]                   |
| 113 |      | 1354 | 1313 | 32.08 | βH46C27C28 [12]                                                                 |
| 114 |      | 1366 | 1325 | 15.48 | vC25C26 [11]; vC23C24 [10]                                                      |
| 115 | 1334 | 1379 | 1338 | 42.55 | vN14C27 [11]                                                                    |
| 116 |      | 1383 | 1342 | 32.18 | vN14C26 [10]                                                                    |
| 117 |      | 1402 | 1360 | 41.98 | βH33C3C2 [47]                                                                   |
| 118 |      | 1405 | 1363 | 3.62  | ГH52C30C31C32 [16]; ГH53C30C31C32 [18];<br>ГH55C31C30C29 [11]                   |
| 119 |      | 1407 | 1365 | 12.51 | ГH46C27N14C15 [11]; ГH47C27N14C15 [18];<br>ГH48C28C29C30 [11]                   |
| 120 |      | 1416 | 1374 | 6.63  | βH56C32H58 [30]; βH56C32H57 [29]; βH57C32H58<br>[25]                            |
| 121 | 1390 | 1420 | 1377 | 18.98 | βH46C27C28 [18]                                                                 |
| 122 |      | 1474 | 1430 | 33.52 | βH42C22C23 [11]; βH45C25C26 [14]; vC16C17<br>[13]; vC19C20 [11]                 |
| 123 |      | 1478 | 1434 | 16.72 | βH35C10C11 [14]; βH36C11C12 [30]; βH37C12C13<br>[11]; vC9C10 [12]; vC12C13 [12] |
| 124 |      | 1489 | 1444 | 2.14  | βH52C30H53 [49]; βH54C31H55 [28]                                                |
| 125 |      | 1490 | 1445 | 8.82  | βH50C29H51 [47]; βH48C28H49 [19]                                                |
| 126 |      | 1492 | 1447 | 25.95 | βH54C31H55 [16]                                                                 |
| 127 |      | 1498 | 1453 | 16.3  | βH48C28H49 [27]; βH57C32H58 [14]                                                |
| 128 |      | 1502 | 1457 | 11.88 | βH56C32H58 [40]; βH56C32H57 [35];<br>ГH56C32C31C30 [15]; βH57C32H58 [15]        |
| 129 |      | 1503 | 1458 | 17.09 | βH46C27H47 [25]; βH50C29H51 [10]                                                |

|     |      |      |      |       |                                                                                                |
|-----|------|------|------|-------|------------------------------------------------------------------------------------------------|
| 130 |      | 1508 | 1463 | 8.92  | $\beta$ H37C12C13 [15]; $\beta$ H38C13C12 [16]; vC8C13 [10]                                    |
| 131 | 1465 | 1511 | 1466 | 7.31  | $\beta$ H46C27H47 [18]; $\beta$ H57C32H58 [15]; $\beta$ H48C28H49 [10]; $\beta$ H54C31H55 [22] |
| 132 |      | 1513 | 1468 | 18.66 | $\beta$ H40C17C18 [10]; vC18C19 [12]                                                           |
| 133 |      | 1518 | 1472 | 15.01 | $\beta$ H48C28H49 [20]; $\beta$ H50C29H51 [21]; $\beta$ H52C30H53 [17]; $\beta$ H54C31H55 [15] |
| 134 |      | 1525 | 1479 | 52.06 | vN14C15 [13]                                                                                   |
| 135 | 1514 | 1593 | 1545 | 68.35 | vC15C16 [24]; vC15C20 [15]; vC2C3 [14]                                                         |
| 136 |      | 1613 | 1565 | 100   | vC2C3 [24]; vC19C20 [11]                                                                       |
| 137 |      | 1620 | 1571 | 23.66 | vC23C24 [18]; vC21C26 [19]; vC21C22 [10]                                                       |
| 138 | 1577 | 1625 | 1576 | 11.01 | vC8C9 [16]; vC9C10 [20]; vC12C13 [20]                                                          |
| 139 |      | 1628 | 1579 | 9.65  | vC8C13 [23]; vC10C11 [23]; vC11C12 [12]; $\beta$ H36C11C12 [10]                                |
| 140 |      | 1644 | 1595 | 22.84 | vC2C3 [15]; vC22C23 [10]; vC25C26 [13]; vC21C22 [12]                                           |
| 141 | 1627 | 1665 | 1615 | 18.82 | vC19C20 [14]; vC21C22 [10]                                                                     |
| 142 | 2208 | 2308 | 2331 | 27.32 | vN4C1 [89]; vC1C2 [11]                                                                         |
| 143 | 2862 | 2995 | 3025 | 8.11  | vC29H50 [34]; vC29H51 [40]; vC30H53 [13]; vC30H52 [12]                                         |
| 144 | 2951 | 3000 | 3030 | 9.96  | vC30H53 [25]; vC30H52 [27]; vC31H54 [15]; vC31H55 [15]                                         |
| 145 |      | 3011 | 3041 | 33.33 | vC30H52 [12]; vC31H54 [31]; vC31H55 [36]                                                       |
| 146 |      | 3015 | 3045 | 4.99  | vC29H50 [25]; vC29H51 [18]; vC30H52 [20]; vC30H53 [24]                                         |
| 147 |      | 3022 | 3052 | 26.97 | vC32H56 [25]; vC32H57 [35]; vC32H58 [36]                                                       |
| 148 |      | 3026 | 3056 | 19.63 | vC31H54 [21]; vC31H55 [22]; vC28H48 [48]; vC28H49 [32]                                         |
| 149 | 3059 | 3027 | 3057 | 6.47  | vC29H50 [20]; vC29H51 [13]; vC28H49 [12]                                                       |
| 150 |      | 3046 | 3076 | 32.21 | vC27H47 [53]; vC27H46 [30]                                                                     |
| 151 |      | 3047 | 3077 | 25.11 | vC30H52 [17]; vC30H53 [16]; vC31H54 [14]; vC31H55 [14]; vC28H49 [11]                           |
| 152 |      | 3061 | 3092 | 22.16 | vC27H46 [14]; vC28H48 [25]; vC28H49 [30]                                                       |
| 153 |      | 3083 | 3114 | 33.44 | vC32H57 [43]; vC32H58 [45]                                                                     |
| 154 |      | 3088 | 3119 | 25.97 | vC27H46 [43]; vC27H47 [34]; vC28H48 [10]; vC28H49 [10]                                         |
| 155 |      | 3089 | 3120 | 56.3  | vC32H56 [74]; vC32H57 [13]; vC32H58 [11]                                                       |
| 156 | 3176 | 3151 | 3183 | 9.07  | vC3H33 [98]                                                                                    |

|     |  |      |      |       |                                                        |
|-----|--|------|------|-------|--------------------------------------------------------|
| 157 |  | 3169 | 3201 | 3.25  | vC23H43 [29]; vC24H44 [46]; vC22H42 [14]; vC25H45 [11] |
| 158 |  | 3171 | 3203 | 3.35  | vC11H36 [51]; vC10H35 [16]; vC12H37 [30]               |
| 159 |  | 3174 | 3206 | 7.01  | vC16H39 [18]; vC17H40 [81]                             |
| 160 |  | 3177 | 3209 | 9.1   | vC24H44 [21]; vC22H42 [54]; vC25H45 [15]               |
| 161 |  | 3183 | 3215 | 14.63 | vC10H35 [43]; vC12H37 [47]                             |
| 162 |  | 3188 | 3220 | 19.47 | vC22H42 [19]; vC23H43 [23]; vC25H45 [53]               |
| 163 |  | 3193 | 3225 | 17.33 | vC10H35 [32]; vC11H36 [43]; vC12H37 [12]               |
| 164 |  | 3194 | 3226 | 17.27 | vC16H39 [81]; vC17H40 [17]                             |
| 165 |  | 3196 | 3228 | 19.38 | vC22H42 [11]; vC23H43 [39]; vC24H44 [27]; vC25H45 [21] |
| 166 |  | 3206 | 3238 | 8.59  | vC12H37 [10]; vC13H38 [86]                             |
| 167 |  | 3211 | 3243 | 8.75  | vC9H34 [89]                                            |
| 168 |  | 3215 | 3247 | 6.09  | vC19H41 [99]                                           |

**Table S3.** Experimental and calculated  $^1\text{H}$  and  $^{13}\text{C}$  chemical shift values of **6g**

| <b>Atom</b> | <b>Calc.</b> | <b>Expt.</b> | <b>Atom</b> | <b>Calc.</b> | <b>Expt.</b> |
|-------------|--------------|--------------|-------------|--------------|--------------|
| H33         | 9.16         | 8.65         | C1          | 113.2        | 114.4        |
| H34         | 7.74         | 7.68         | C2          | 107.5        | 109.5        |
| H35         | 7.52         | 7.56         | C3          | 149.9        | 152.7        |
| H36         | 7.58         | 7.58         | C8          | 141.3        | 141.0        |
| H37         | 7.43         | 7.44         | C9          | 125.7        | 128.3        |
| H38         | 7.50         | 7.54         | C10         | 126.9        | 128.7        |
| H39         | 7.28         | 7.33         | C11         | 132.1        | 134.1        |
| H40         | 7.44         | 7.46         | C12         | 127.7        | 129.5        |
| H41         | 8.01         | 8.37         | C13         | 124.3        | 128.3        |
| H42         | 7.89         | 8.13         | C15         | 142.3        | 143.7        |
| H43         | 7.21         | 7.31         | C16         | 106.6        | 108.9        |
| H44         | 7.44         | 7.45         | C17         | 132.8        | 134.1        |
| H45         | 7.30         | 7.35         | C18         | 118.9        | 120.7        |
| H46         | 3.98         | 4.33         | C19         | 119.0        | 122.5        |
| H47         | 3.98         | 4.29         | C20         | 122.4        | 127.1        |
| H48         | 1.57         | 1.90         | C21         | 120.9        | 123.5        |
| H49         | 1.59         | 1.83         | C22         | 118.9        | 121.1        |
| H50         | 1.36         | 1.36         | C23         | 118.5        | 120.8        |
| H51         | 1.35         | 1.34         | C24         | 125.2        | 128.3        |
| H52         | 1.16         | 1.24         | C25         | 106.9        | 109.5        |
| H53         | 1.16         | 1.26         | C26         | 139.5        | 139.0        |
| H54         | 1.28         | 1.29         | C27         | 43.1         | 43.4         |
| H55         | 1.28         | 1.28         | C28         | 30.1         | 28.8         |
| H56         | 1.03         | 0.87         | C29         | 29.4         | 26.8         |
| H57         | 0.76         | 0.85         | C30         | 34.4         | 31.4         |
| H58         | 0.76         | 0.83         | C31         | 25.9         | 22.4         |
|             |              |              | C32         | 14.0         | 13.9         |
